# Supplementary material for: A molybdovanadophosphate-based surfactant encapsulated heteropolyanion with multi-lamellar nano-structure for catalytic wet air oxidation of organic pollutants under ambient conditions
Source: Royal Society of Chemistry journal article supplement (doi:10.1039/c5ra18530k), 2015-01-01
Supplement: c5ra18530k1.pdf [file c5ra18530k1.pdf]

## Electronic Supporting Information

### **A molybdovanadophosphate-based surfactant encapsulated heteropolyanion with multi-lamellar nano-structure for catalytic wet air oxidation of organic pollutant under ambient conditions**

Shun Kuang Lua<sup>a,b,c</sup>, Wen-Da Oh<sup>a,b,d</sup>, Li-Zhi Zhang<sup>b</sup>, Lei Yao<sup>b,c</sup>, Teik-Thye Lim<sup>d</sup>, ZhiLi Dong<sup>c\*</sup>

<sup>a</sup> Interdisciplinary Graduate School, Nanyang Technological University, 50 Nanyang Avenue, Singapore 639798, Singapore.

<sup>b</sup> Nanyang Environment and Water Research Institute, Nanyang Technological University, 1 Cleantech Loop, CleanTech One, Singapore 637141, Singapore.

<sup>c</sup> School of Materials Science and Engineering, Nanyang Technological University, 50 Nanyang Avenue, Singapore 639798, Singapore.

<sup>d</sup> Division of Environmental and Water Resources Engineering, School of Civil and Environmental Engineering, Nanyang Technological University, 50 Nanyang Avenue, Singapore 639798, Singapore

\* Corresponding author: Tel: +65-6790 6727, Fax: +65-6791 9081, E-mail: [zldong@ntu.edu.sg](mailto:zldong@ntu.edu.sg)

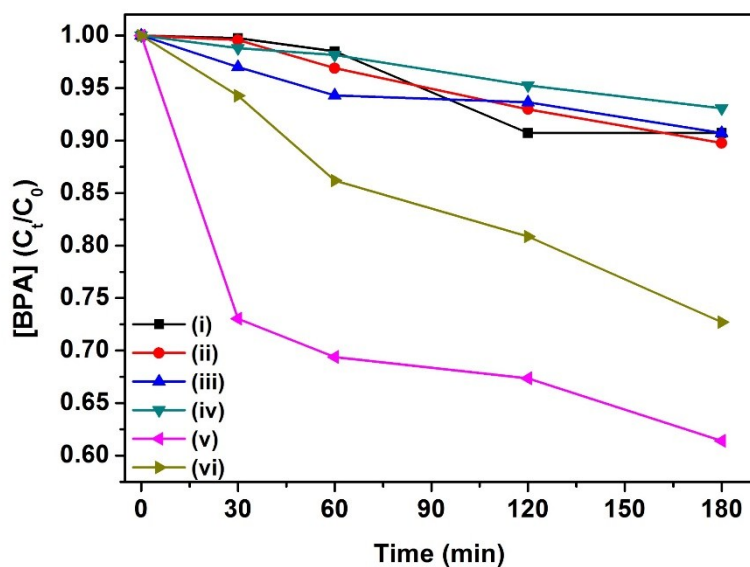

**Figure S1** BPA removal without aeration by (i) DMDOA:MVPA-2 2:1, (ii) DMDOA:MVPA-2 3:1 prepared with chloroform : *n*-butanol in 3:1 ratio; and (iii) DMDOA:MVPA-2 5:1 in pure chloroform. BPA removal with aeration by (iv) DMDOA:MVPA-2 2:1, (v) DMDOA:MVPA-2 3:1 prepared with chloroform : *n*-butanol in 3:1 ratio; and (vi) DMDOA:MVPA-2 5:1 in pure chloroform.

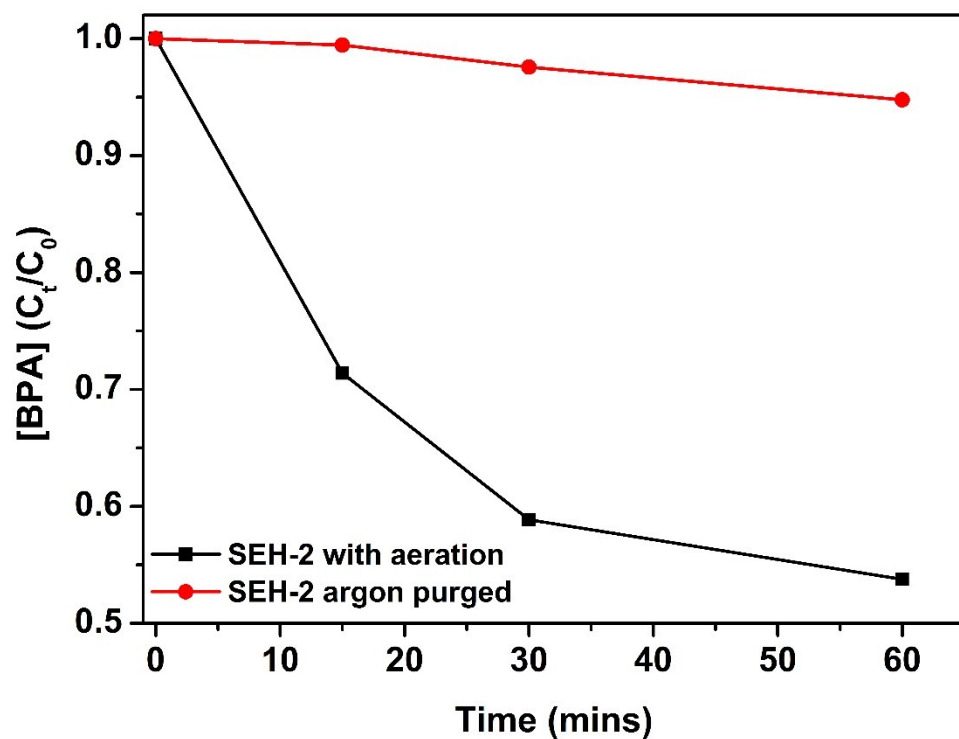

**Figure S2** BPA removal using SEH-2 with aeration and in argon purged solution, showing limited adsorption effects in the absence of oxygen.

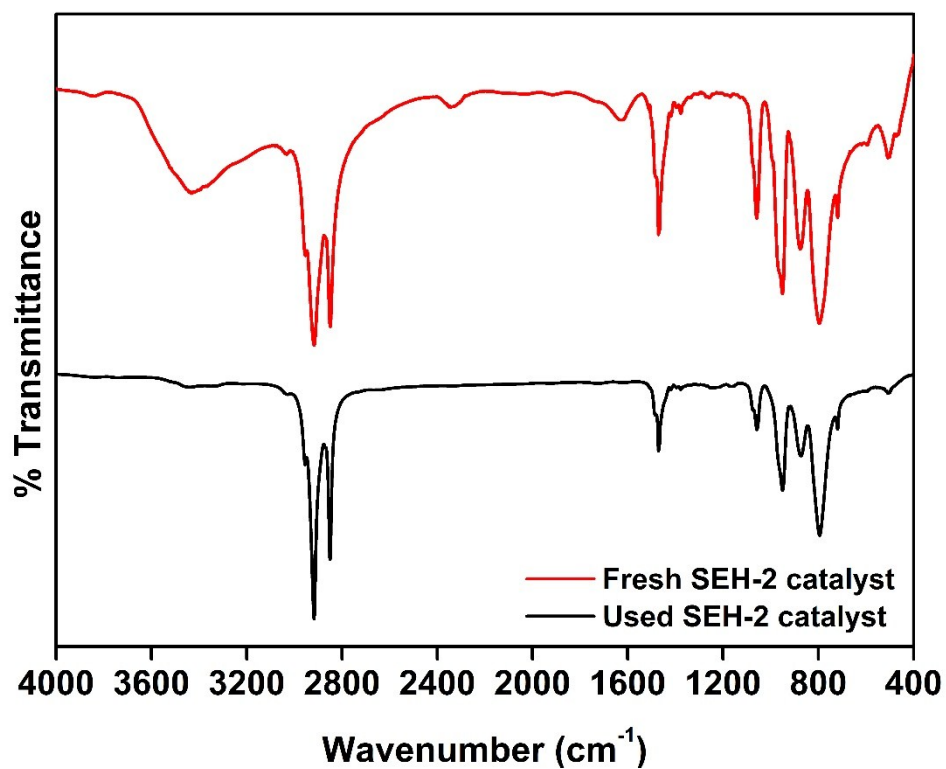

**Figure S3** FTIR spectrum of fresh SEH-2 and used SEH-2. Fresh catalyst exhibit characteristic peaks of water, while the used catalyst shows no presence of water after drying post usage. The Characteristic peaks of MVP-2 and DMDOA are consistent before and after catalytic procedure.
